# Supplementary material for: Epistemic beliefs’ role in promoting misperceptions and conspiracist ideation
Source: PLOS journal article supplement (doi:10.1371/journal.pone.0184733), 2017-09-18

**S1 Fig. Typical CFA Factor Loadings for epistemic belief items**

All links shown are standardized and significant;  $p < .001$ . Results from NSF 2016, Wave 1 shown.

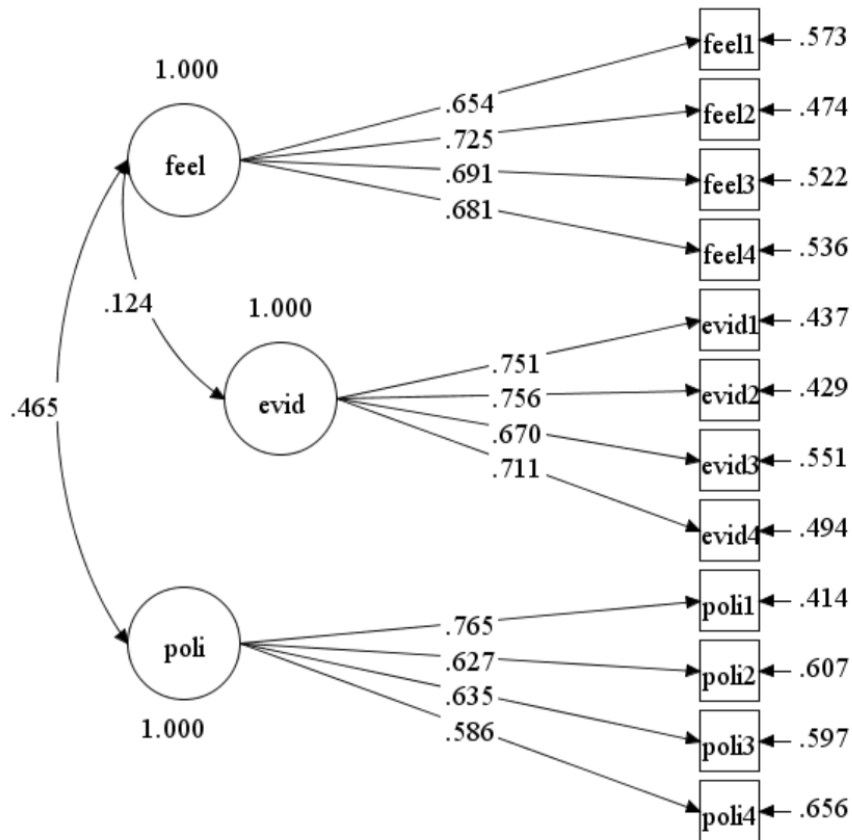

Supplement: S6 (10.1371/journal.pone.0184733.s006) [file journal.pone.0184733.s006]
