# Supplementary material for: Epistemic beliefs’ role in promoting misperceptions and conspiracist ideation
Source: PLOS journal article supplement (doi:10.1371/journal.pone.0184733), 2017-09-18

**S2 Fig. Frequency distributions of composite scores for three epistemic beliefs**

Each histogram shows the distribution of composite scale scores. Each variable represents the average response across the four constituent items on a five-point scale from 'Strongly agree' (1) to 'Strongly disagree' (5). Results from NSF 2016, wave 1 shown.

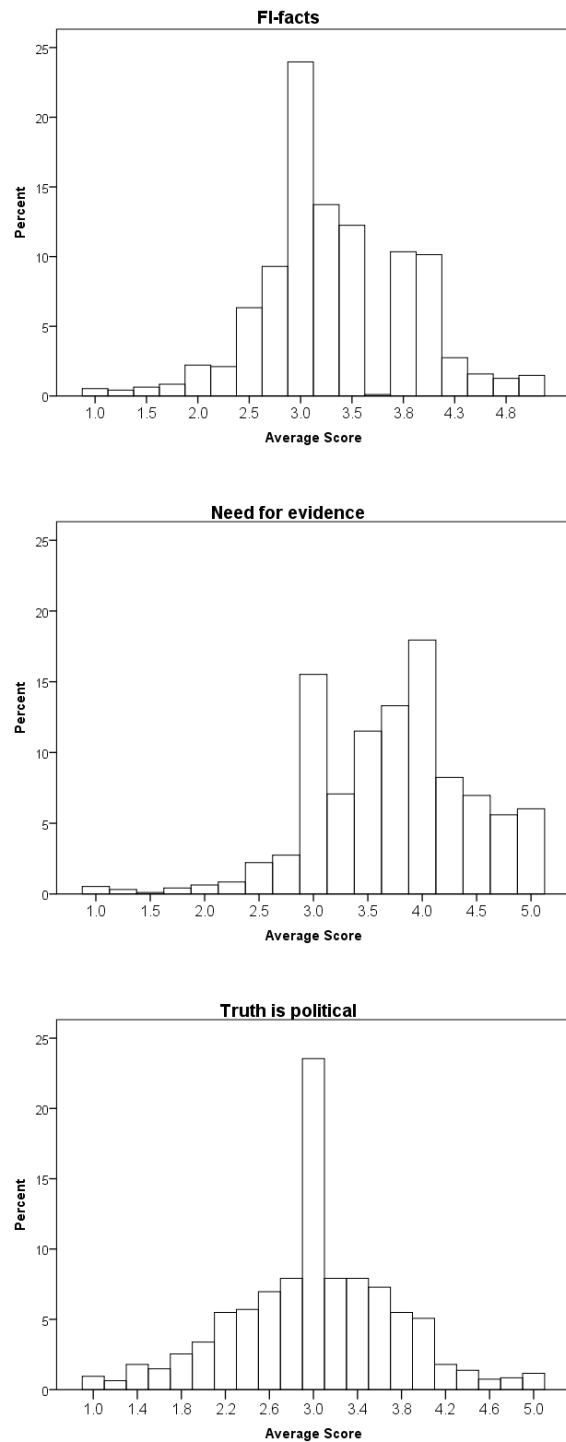

Supplement: S7 (10.1371/journal.pone.0184733.s007) [file journal.pone.0184733.s007]
