# Supplementary material for: Epistemic beliefs’ role in promoting misperceptions and conspiracist ideation
Source: PLOS journal article supplement (doi:10.1371/journal.pone.0184733), 2017-09-18

**S4 Fig. Scatterplots of Need for Evidence by accuracy with locally weighted regression lines**

Values shown are for composite scales. Size of marker corresponds to number of cases. Fit line drawn using iterative least squares (Loess) with 50% of the data points to calculate the local smoother via the Epanechnikov kernel function. Fit lines suggest a relationship between *Need for evidence* and issue accuracy, though it may in some cases be non-linear (e.g., WMD beliefs).

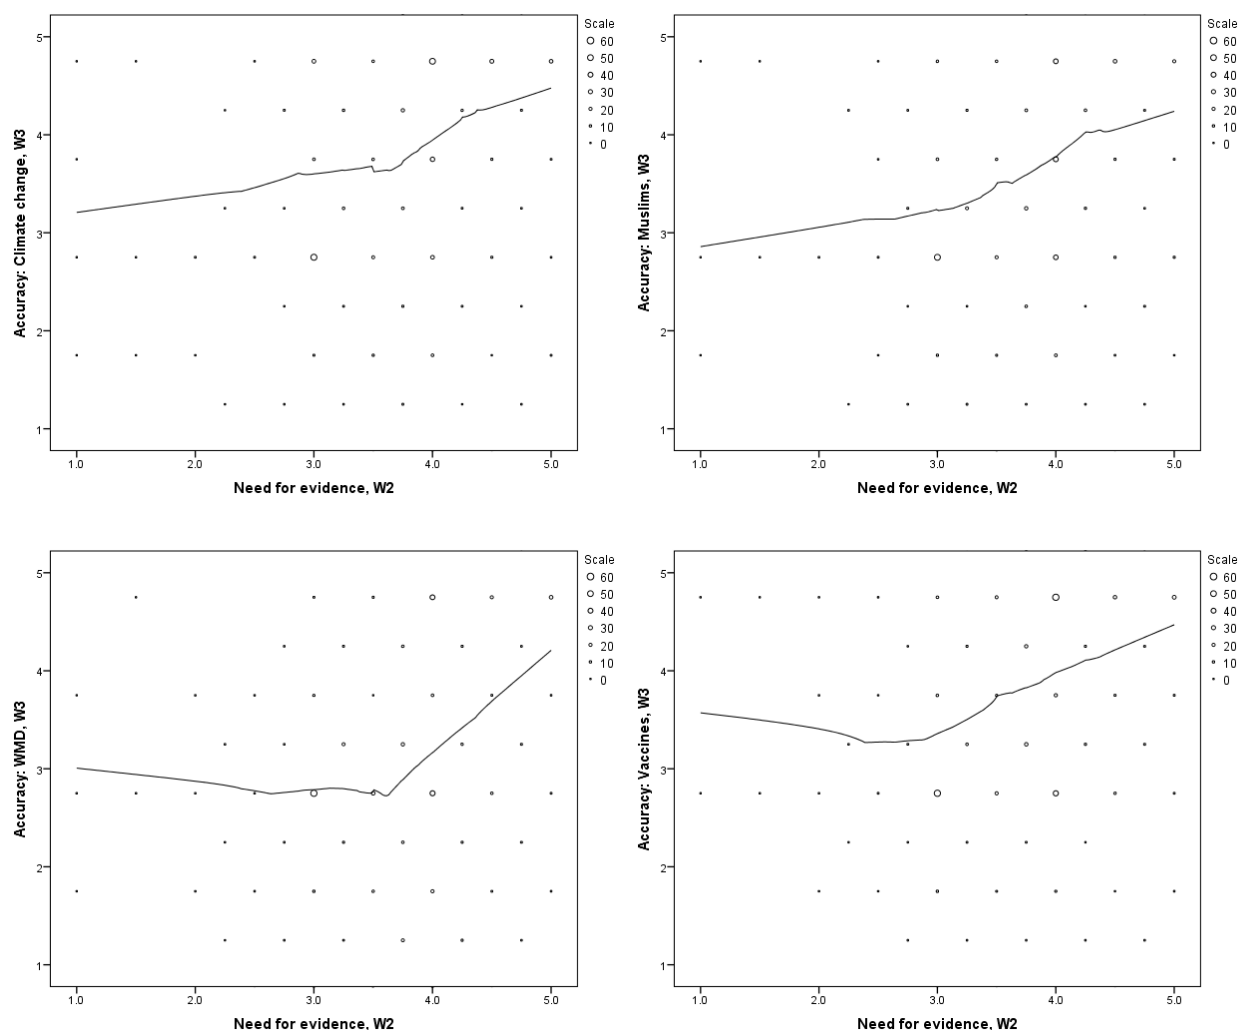

Supplement: S9 (10.1371/journal.pone.0184733.s009) [file journal.pone.0184733.s009]
